# Supplementary material for: Systemic GLP-1R agonist treatment reverses mouse glial and neurovascular cell transcriptomic aging signatures in a genome-wide manner
Source: PubMed Central journal article supplement (PMC8172568; doi:10.1038/s42003-021-02208-9), 2021-06-02
Supplement: 42003_2021_2208_MOESM2_ESM.pdf [file 42003_2021_2208_MOESM2_ESM.pdf]

**Supplementary Information**

**Systemic GLP-1R agonist treatment reverses mouse glial and neurovascular  
cell transcriptomic aging signatures in a genome-wide manner**

**Li, Chen, Vong and Zhao *et al.***

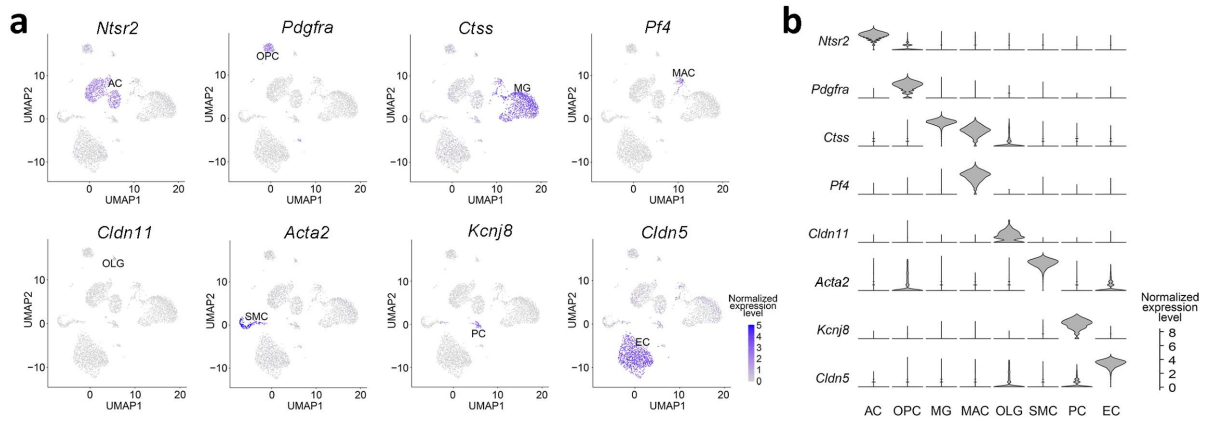

**Supplementary Fig. 1. Primary cell type identification and their marker gene expression patterns. (a)** UMAP visualization and **(b)** violin plots of cell type-specific marker gene expression patterns in the different cell type clusters. For clarity, 6000 cells were subsampled for visualization in each plot in **(a)**. Cell type abbreviations: same as in **Fig. 1**.

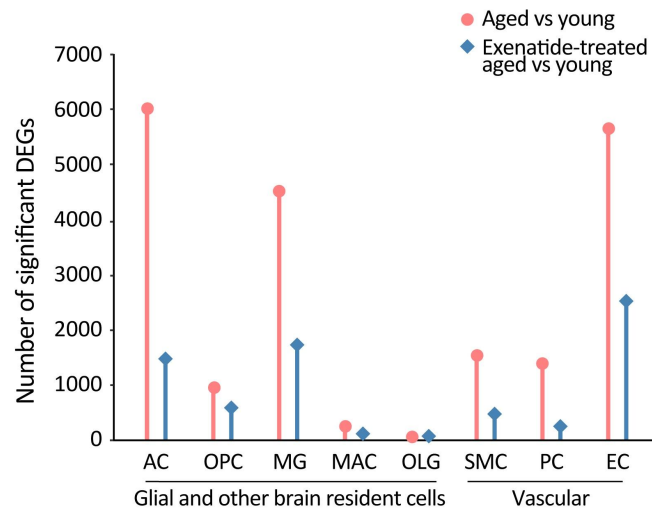

**Supplementary Fig. 2. Number of significant differentially expressed genes (DEGs) for aged vs young adult mice, and exenatide-treated aged vs young adult mice comparisons in each cell type.** Cell type abbreviations: same as in Fig. 1.

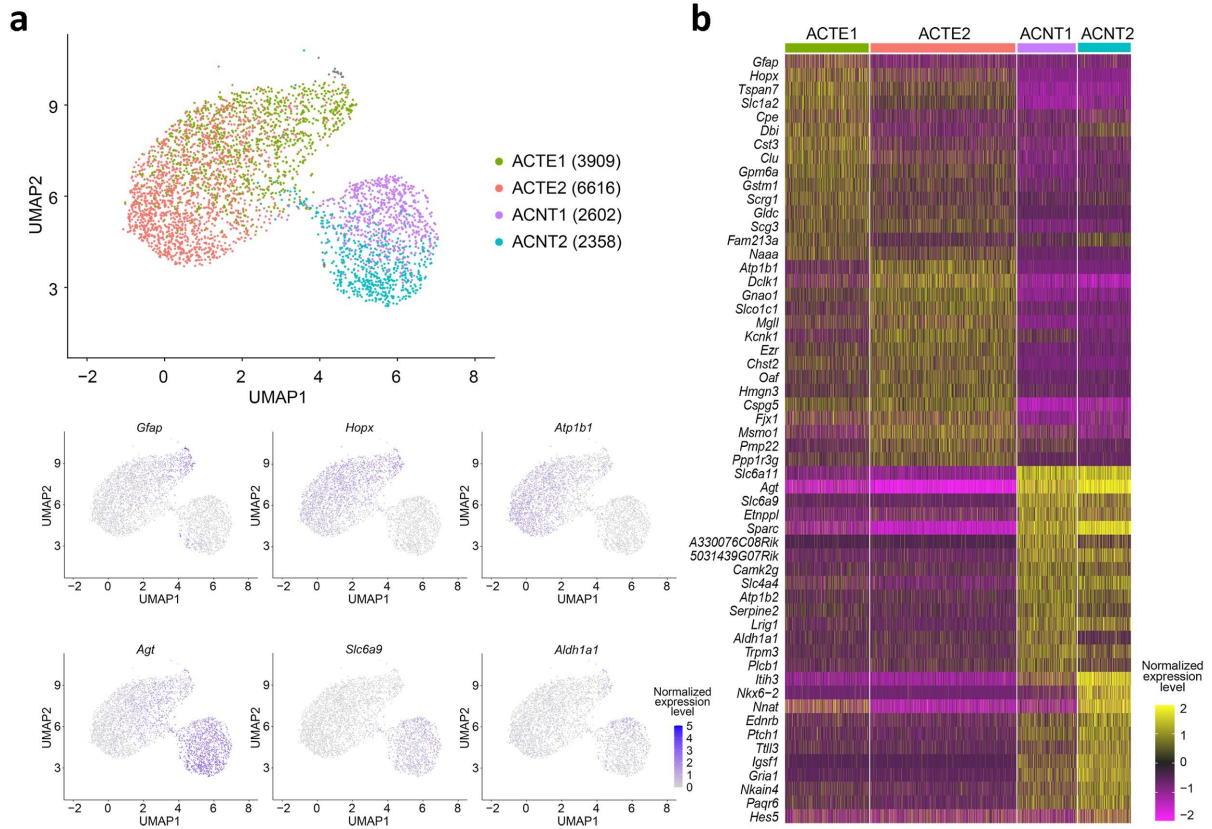

**Supplementary Fig. 3. Identification of regional astrocyte (AC) subtypes.** (a) UMAP visualization and (b) heatmap of marker gene expression patterns in the different regional AC subtype clusters, including telencephalic AC cluster 1 (ACTE1), telencephalic AC cluster 2 (ACTE2), non-telencephalic AC cluster 1 (ACNT1) and non-telencephalic AC cluster 2 (ACNT2). Numbers in brackets: cell numbers for the respective AC subtypes in the dataset. For clarity, 4000 cells were subsampled for visualization in each plot in (a).

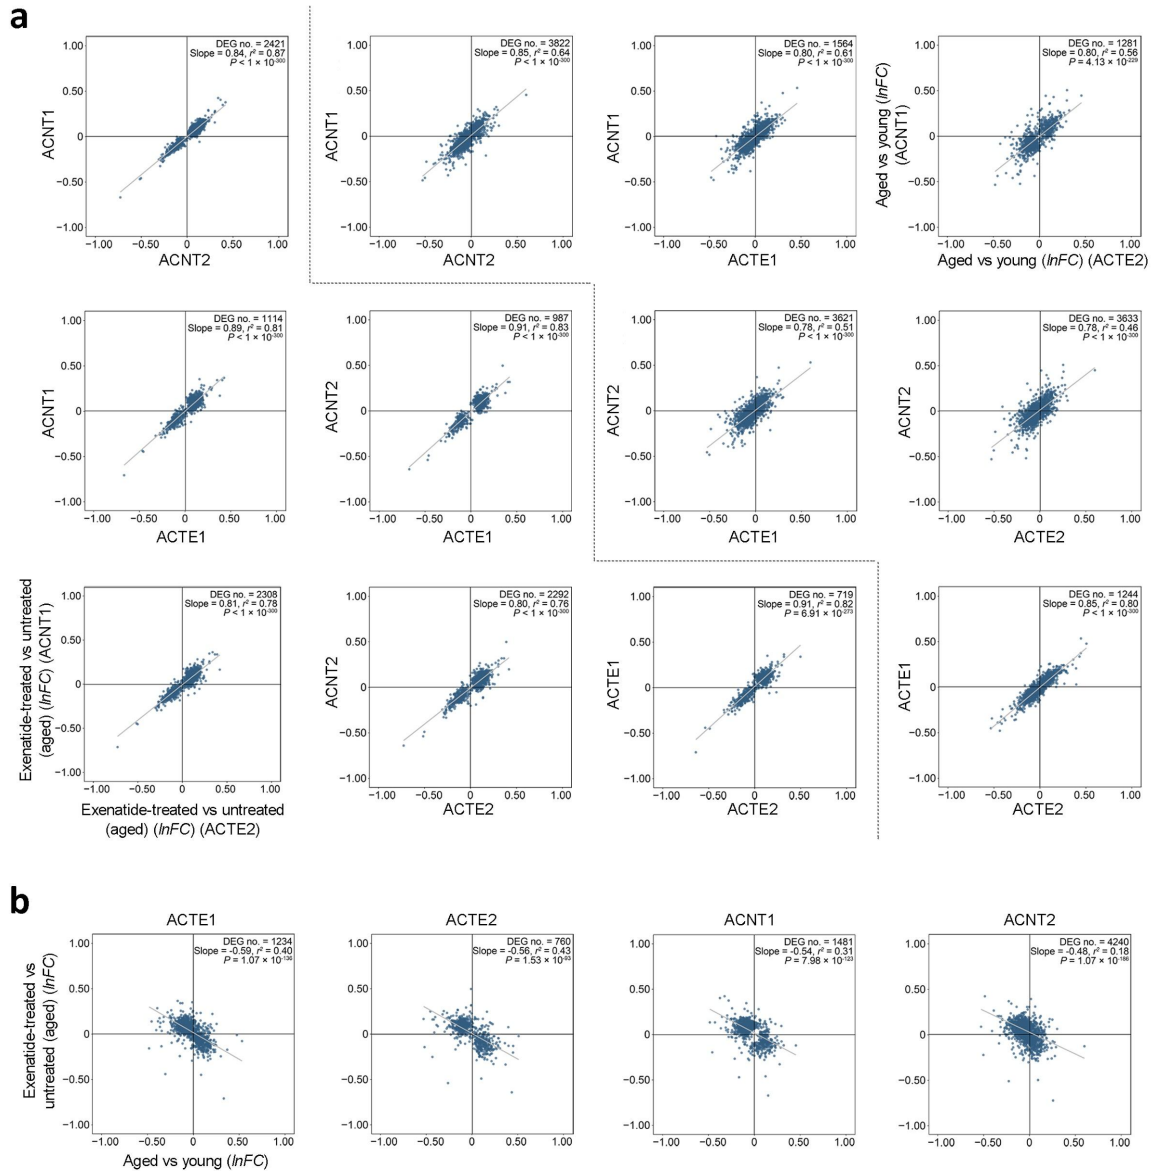

**Supplementary Fig. 4. Consistency of differential expressions in the different regional astrocyte (AC) subtype clusters in aging and after GLP-1RA treatment. (a)** Pairwise comparisons of age-related (above-diagonal plots in the array) and exenatide treatment-associated (below-diagonal plots in the array) differential expressions in the four AC subtypes (i.e., ACTE1, ACTE2, ACNT1 and ACNT2). **(b)** Expression changes in the regional AC subtypes in aging ( $x$ -axis) plotted against that after exenatide treatment ( $y$ -axis). For all plots in **(a)** and **(b)**: Each dot represents one differentially expressed gene (DEG).  $\ln FC$ : natural log of fold change. Grey lines: lines of best fit by linear regression. Cell type / subtype abbreviations: same as in **Supplementary Fig. 3**.

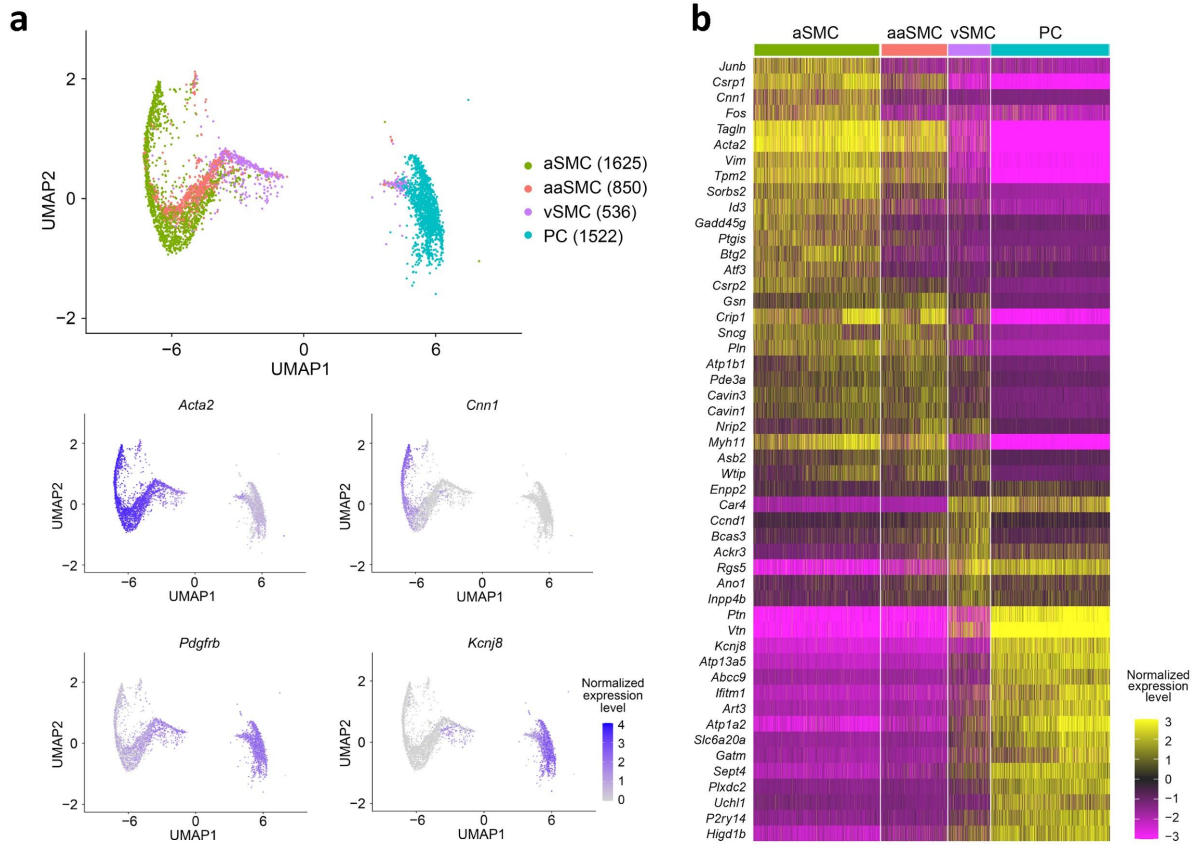

**Supplementary Fig. 5. Identification of mural cell subtypes.** (a) UMAP visualization and (b) heatmap of marker gene expression patterns in the different mural subtypes, including arterial smooth muscle cell (aSMC), arteriolar SMC (aaSMC), venous SMC (vSMC) and pericyte (PC). Numbers in brackets: cell numbers for the respective cell subtypes.

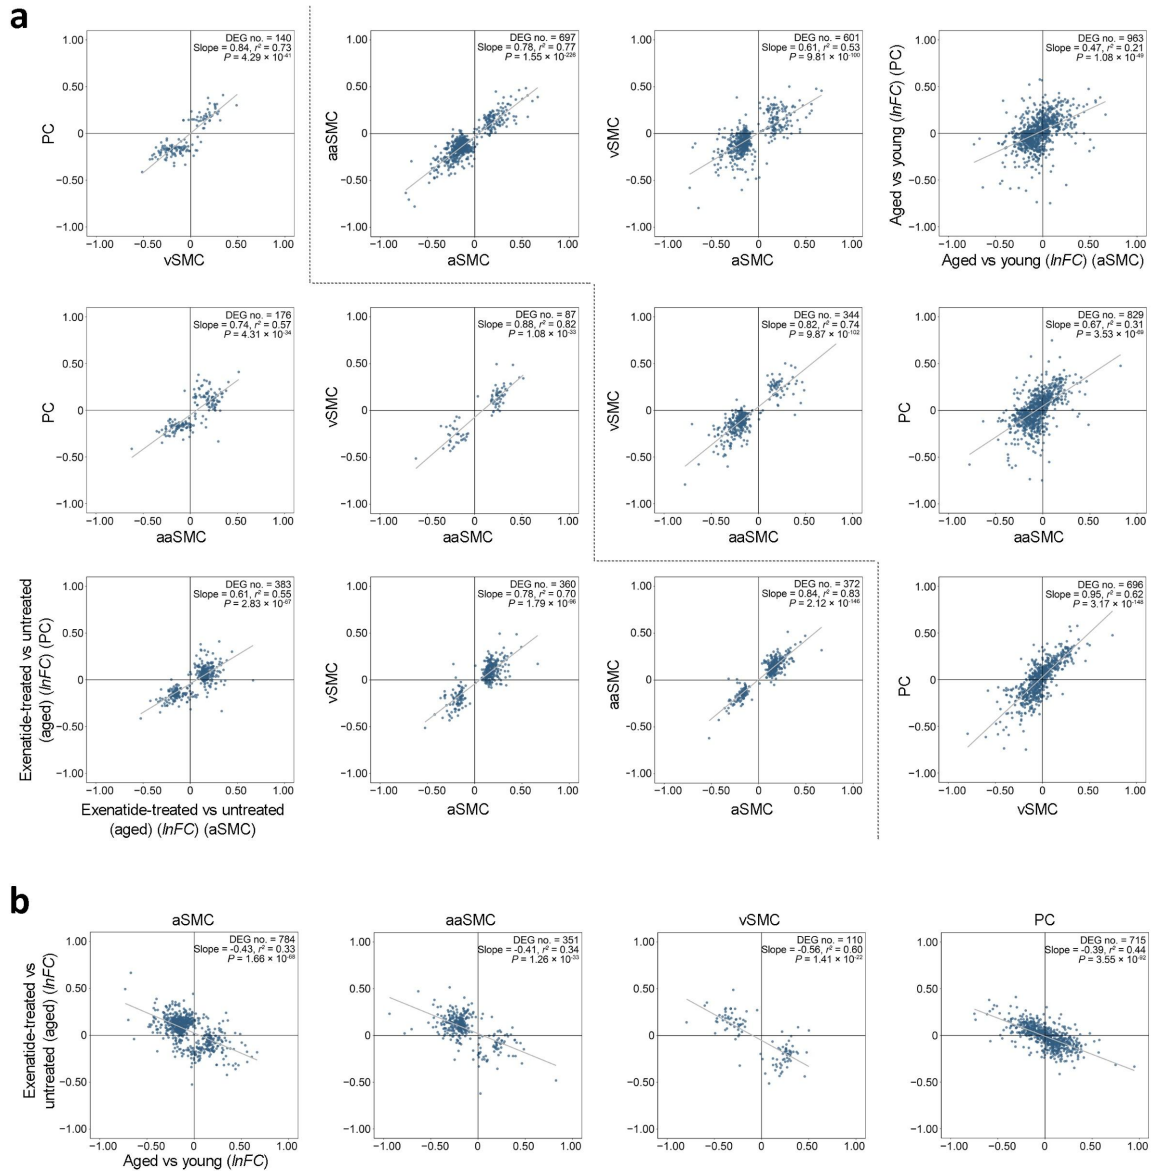

**Supplementary Fig. 6. Consistency of differential expressions in the different mural cell subtypes in aging and after GLP-1RA treatment. (a)** Pairwise comparisons of age-related (above-diagonal plots in the array) and exenatide treatment-associated (below-diagonal plots in the array) differential expressions in the four mural cell subtypes (aSMC, aaSMC, vSMC and PC). **(b)** Expression changes in the mural cell subtypes in aging ( $x$ -axis) plotted against that after exenatide treatment ( $y$ -axis). For all plots in **(a)** and **(b)**: Each dot represents one differentially expressed gene (DEG).  $\ln FC$ : natural log of fold change. Grey lines: lines of best fit by linear regression. Cell type / subtype abbreviations: same as in **Supplementary Fig. 5**.

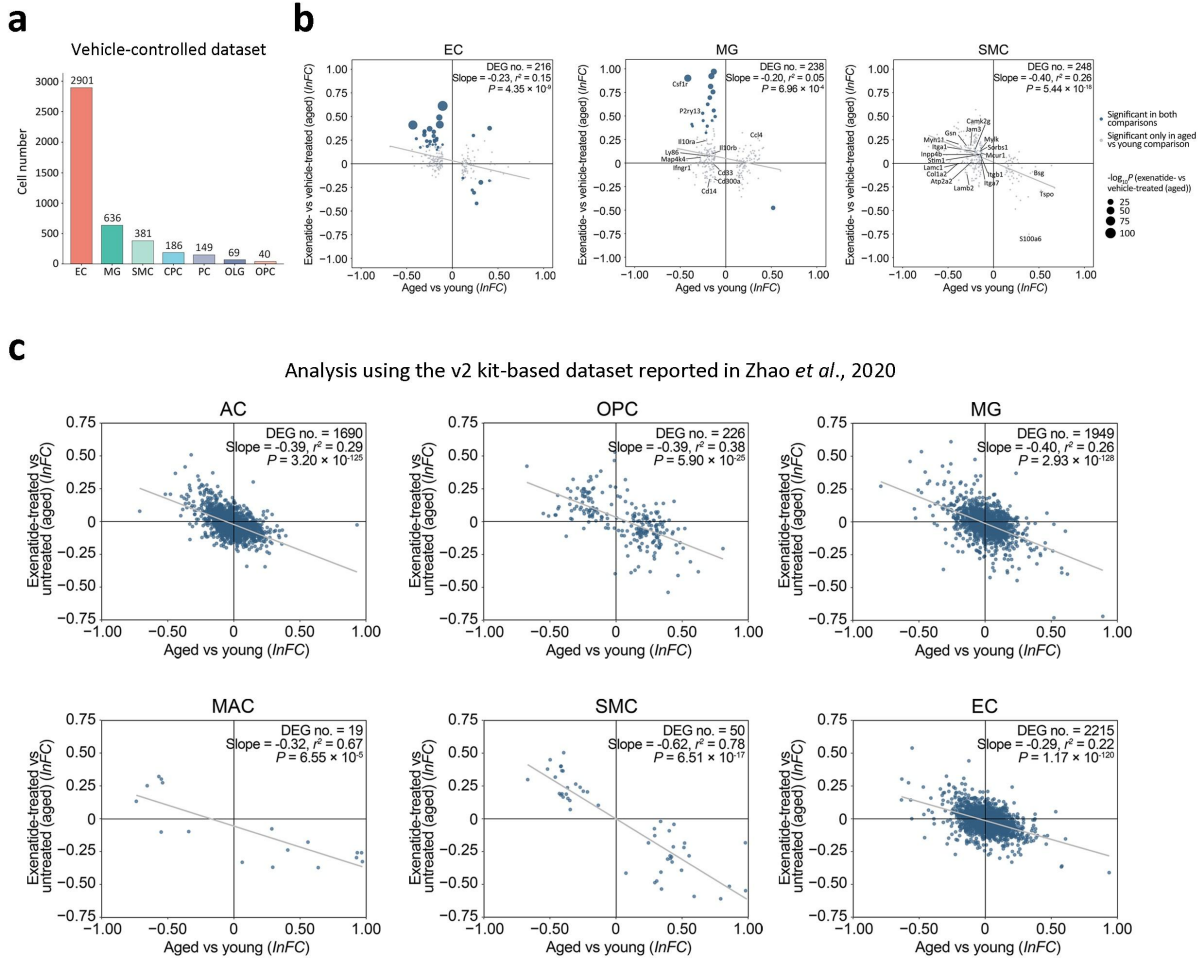

**Supplementary Fig. 7. Further verification of main results on the genome-wide reversal of age-related transcriptomic changes by GLP-1RA treatment with two additional datasets. (a)** Number of cells for each cell type in the vehicle-controlled dataset. **(b)** Age-related expression changes for the top reversed differentially expressed genes (DEGs) ( $x$ -axis, in the v3 kit-based dataset, see **Methods**) plotted against post-exenatide treatment expression changes ( $y$ -axis, in the vehicle-controlled dataset), for the cell types with top three cell numbers in the vehicle-controlled dataset (i.e., EC, MG and SMC). Each dot represents one DEG, with dot size scaling according to the negative logarithm of the  $P$ -values in the exenatide- vs vehicle-treatment comparison.  $\ln FC$ : natural log of fold change. Grey lines: lines of best fit by linear regression. **(c)** Additional results of age-related transcriptomic changes reversed by exenatide treatment, based on analyzing a previously reported dataset (in Zhao *et al.*, 2020, designated as v2 kit-based dataset as it was acquired using the 10X Genomics Chromium Single Cell 3' Reagent Kits v2). Identical analysis was performed as shown in **Fig. 1c** for the different cell types. Cell type abbreviations: same as in **Fig. 1**.
