# Supplementary material for: Systemic GLP-1R agonist treatment reverses mouse glial and neurovascular cell transcriptomic aging signatures in a genome-wide manner
Source: PubMed Central journal article supplement (PMC8172568; doi:10.1038/s42003-021-02208-9), 2021-06-02
Supplement: 42003_2021_2208_MOESM3_ESM.pdf [file 42003_2021_2208_MOESM3_ESM.pdf]

## **Description of Additional Supplementary Files**

**File name:** Supplementary Data 1

**Description:** Source data underlying the graphs and charts presented in the main figures.
